# Supplementary material for: Glycation by glyoxal leads to profound changes in the behavior of dermal fibroblasts
Source: PubMed Central journal article supplement — BMJ Open Diabetes Res Care. 2021 Apr 26;9(1):e002091. doi: 10.1136/bmjdrc-2020-002091 (PMC8076933; doi:10.1136/bmjdrc-2020-002091), 2021-04-26

## ONLINE SUPPLEMENTAL MATERIAL

### SUPPLEMENTAL FIGURE LEGENDS

#### **Supplemental figure 1. Surface area of fibroblasts was decreased after glyoxal addition**

Assay was made on 5 fibroblasts on 3 different wells from 1 donor. Measure of cellular area in  $\mu\text{m}^2$ . Mann-Whitney test control versus glyoxal is indicated \*\*  $p < 0.01$ . Data represent the mean  $\pm$  SD.

#### **Supplemental figure 2. Post confluent fibroblasts accumulated larger lipid vesicles**

Assays were made on 8 days post confluence fibroblasts from three different donors. Control: untreated cells; Glyoxal: (0,6 mM). **A/** Immunofluorescence of BODIPY 493/503 in green, and DAPI for nucleus in blue (Scale bare, 20  $\mu\text{m}$ ). **B/** Quantification of lipid droplets diameter (nm). Mann-Whitney test control versus glyoxal is indicated \*\*\*  $p < 0.001$ . Data represent the mean  $\pm$  SD.

#### **Supplemental figure 3. AICAR 1mM induced an important phosphorylation of AMPk**

Assays were made on fibroblasts from three different donors. Control: untreated cells; Glyoxal: (0,6 mM); AICAR (1 mM); Glyoxal+AICAR: (0.6 mM glyoxal+1 mM AICAR). **A/** Western-blot analysis of AMPk $\alpha$  and P-AMPk $\alpha$ . **B/** Quantification of P-AMPk $\alpha$ / AMPk $\alpha$  ratio. Multiple t test is indicated \*\*  $p < 0.01$ ; ns = non-significant. Data represent the mean  $\pm$  SD.

**SUPPLEMENTAL FIGURES****Supplementary figure 1.**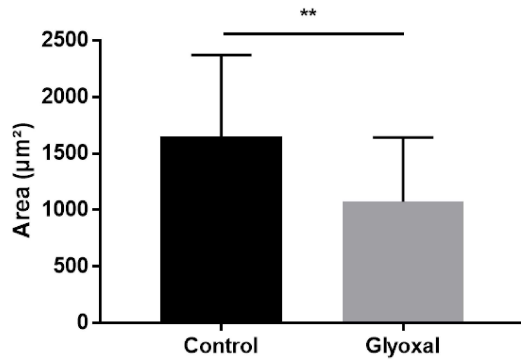**Supplementary figure 2.**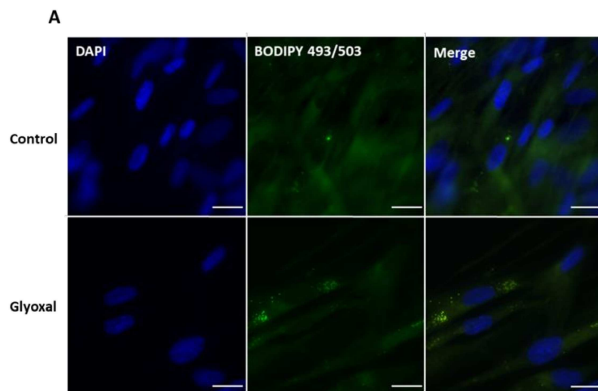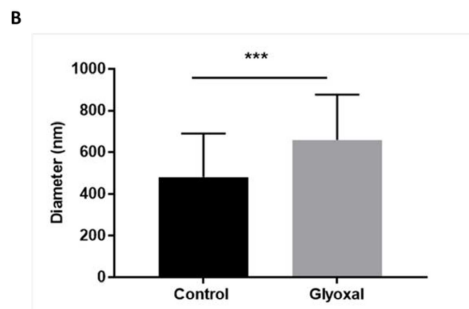

## Supplemental figure 3.

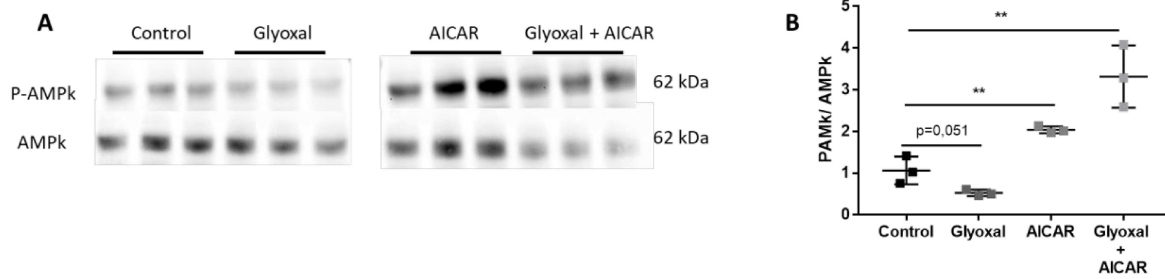

Supplement: bmjdrc-2020-002091supp001.pdf [file bmjdrc-2020-002091supp001.pdf]
